# Supplementary material for: Enhancing the stability of the Rh/ZnO catalyst by the growth of ZIF-8 for the hydroformylation of higher olefins
Source: Royal Society of Chemistry journal article supplement (doi:10.1039/d0ra06515c), 2020-01-01
Supplement: d0ra06515c1.pdf [file d0ra06515c1.pdf]

## Enhancing the stability of Rh/ZnO catalyst by growth of ZIF-8 for hydroformylation of higher olefins

Lele Chen<sup>a</sup>, Jinghao Tian<sup>a</sup>, Huaxing Song<sup>a</sup>, Zhaohua Gao<sup>a</sup>, Haisheng Wei<sup>a,b\*</sup>, Wenhua Wang<sup>a,b</sup>,  
Wanzhong Ren<sup>a,b</sup>

<sup>a</sup> College of Chemistry and Chemical Engineering, Yantai University, Yantai 264005, Shandong, China

<sup>b</sup> Collaborative Innovation Center of Comprehensive Utilization of Light Hydrocarbon Resource,  
Yantai University, Yantai 264005, Shandong, China

\*Corresponding author.

E-mail address: haishengwei@ytu.edu.cn (H. Wei)

Table S1 Hot filtration experiment results for different catalysts

| Catalyst                              | Time<br>(h) | Conv.<br>(%) | Sel. (%) |            |
|---------------------------------------|-------------|--------------|----------|------------|
|                                       |             |              | Aldehyde | Iso-alkene |
| 0.5%Rh/ZnO-C                          | 1           | 68           | 51       | 49         |
| 0.5%Rh/ZnO-C <sup>a</sup>             | 4           | 97           | 99       | 1          |
| 0.5%Rh/ZnO <sub>50</sub>              | 1.5         | 52           | 54       | 46         |
| 0.5%Rh/ZnO <sub>50</sub> <sup>a</sup> | 1.5         | 98           | 66       | 34         |
| 0.5%Rh/ZnO-S                          | 1           | 55           | 57       | 43         |
| 0.5%Rh/ZnO-S <sup>a</sup>             | 4           | 95           | 93       | 7          |

Reaction condition: 4.0 MPa (CO/H<sub>2</sub>=1), 90 °C, 2.5 mmol 1-dodecene, 1.0 mmol 1-octanol as internal standard, 2 h, a refer to the continued reaction without catalyst.

Table S2 Concentration of loss Rh in different hot filtered solution

| Catalyst                        | Loss of Rh (%) |
|---------------------------------|----------------|
| 0.5%Rh/ZnO-C                    | 33.6           |
| 0.5%Rh/ZnO <sub>50</sub>        | 18.2           |
| 0.5%Rh/ZnO-S                    | 35.2           |
| 0.5%Rh/ZnO <sub>50</sub> @ZIF-8 | 0.55           |

Table S3 Catalytic results of 0.5%Rh/ZnO<sub>50</sub>@ZIF-8 catalyst in other substrate.

| Substrate | Conversion (%) | Selectivity (%) |            | L/B |
|-----------|----------------|-----------------|------------|-----|
|           |                | Aldehyde        | Iso-olefin |     |
| 1-hexene  | 98.2           | 90.1            | 9.9        | 0.8 |
| 1-octene  | 99.4           | 87.5            | 12.5       | 1.2 |
| 1-decene  | 97.3           | 84.5            | 15.5       | 1.5 |

Reaction condition: 4.0 MPa (CO/H<sub>2</sub>=1), 90 °C, 2.5 mmol substrate, 1.0 mmol 1-octanol as internal standard, 4.5 h, L/B ratio refer to the ratio of linear to branched aldehyde in the products.

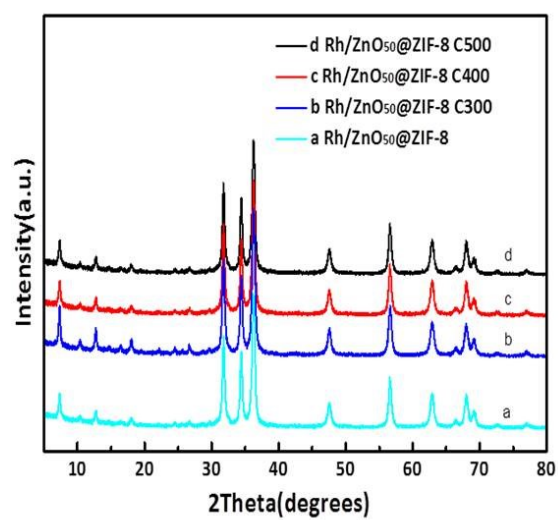

Fig. S1 XRD patterns of Rh/ZnO<sub>50</sub>@ZIF-8 treated at different temperatures

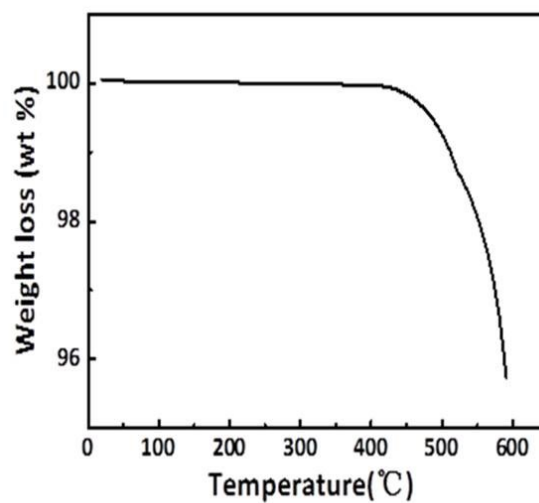

Fig. S2 TG curve of Rh/ZnO<sub>50</sub>@ZIF-8 catalyst

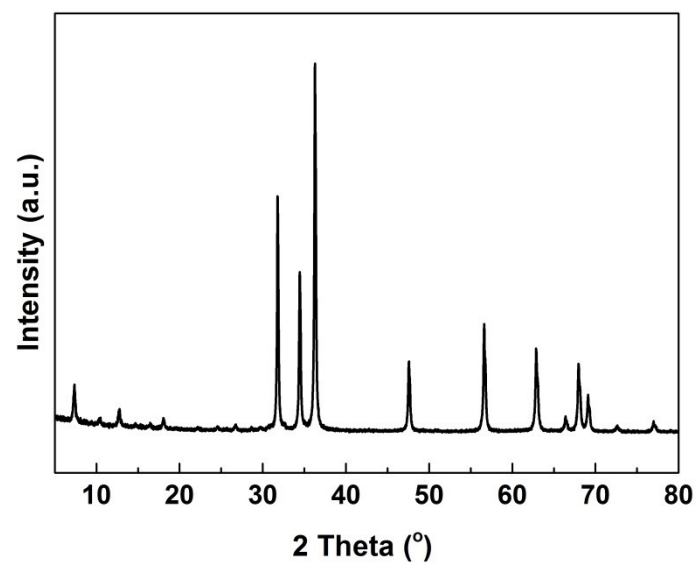

Fig. S3 XRD pattern of Rh/ZnO@ZIF-8 catalyst after cyclic experiment
